# Supplementary material
Source: PubMed Central journal article supplement (PMC4453793)
Supplement: supp_pp.15.00403_00403suppfigs.pdf [file supp_pp.15.00403_00403suppfigs.pdf]

## Supplemental Figures

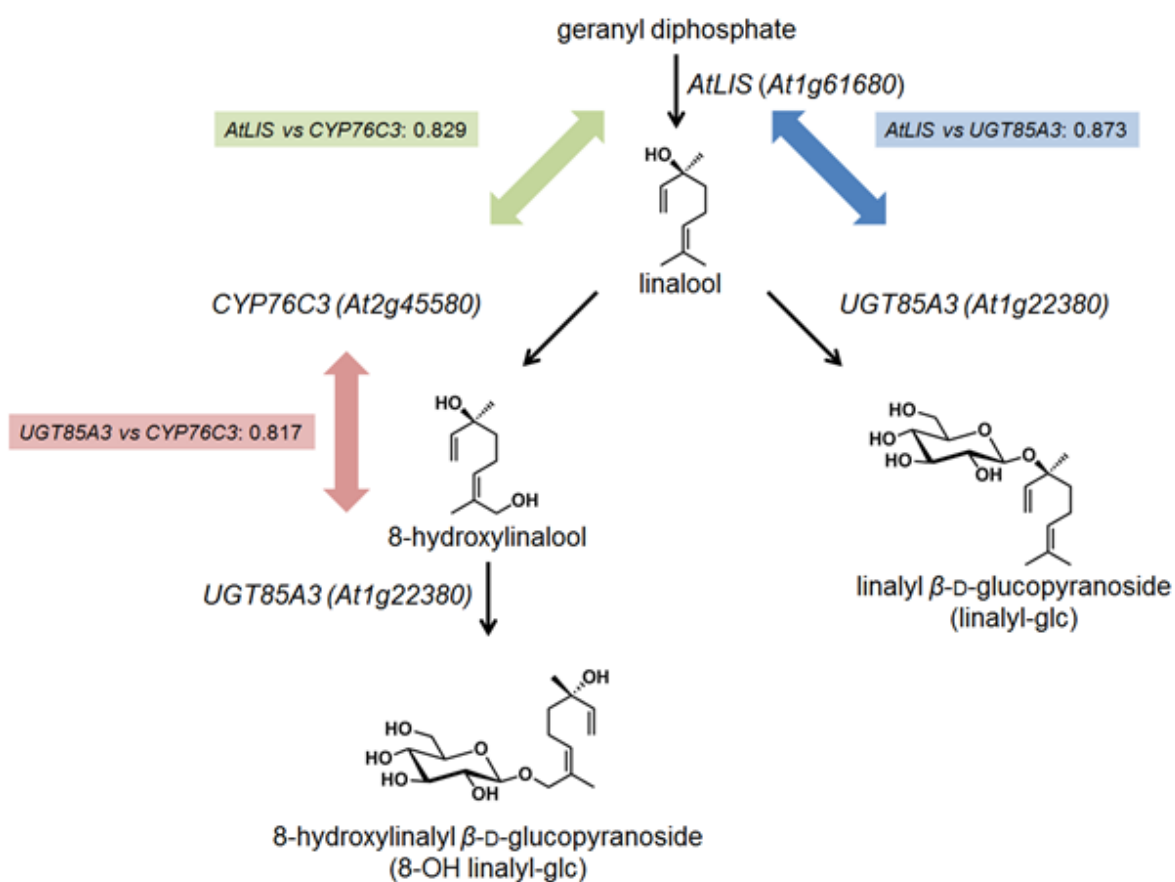

Supplemental Figure S1. Co-expression analysis of *AtLIS*, *CYP76Cs* and *UGT85A3* by ATTDII (Gene coexpression database, <http://atted.jp/>) with Ver. C4.1.

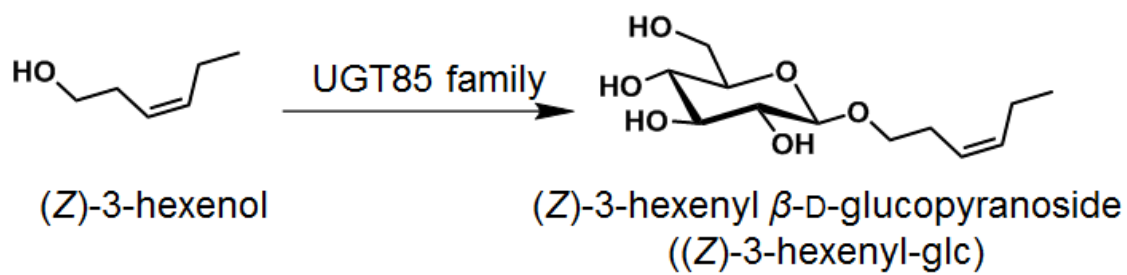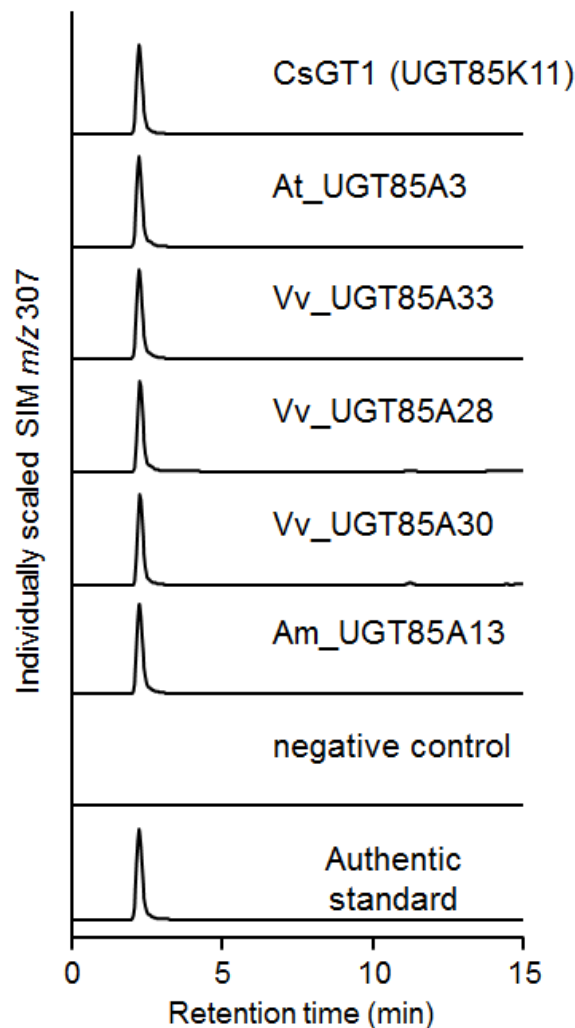

**Supplemental Figure S2. Enzymatic activity of CsGT1 homologs for (Z)-3-hexenol.** *In vitro* characterization of UGT85s toward (Z)-3-hexenol with tea plant (CsGT1; UGT85K11), Arabidopsis (At\_UGT85A3), grapevine (*Vitis vinifera*: Vv\_UGT85A33, Vv\_UGT85A28, Vv\_UGT85A30) and snapdragon (*Antirrhinum majus*: Am\_UGT85A13). LC-MS analysis of the enzymatic product of CsGT1 (UGT85K11), At\_UGT85A1, At\_UGT85A3, Vv\_UGT85A33, Vv\_UGT85A28, Vv\_UGT85A30 and Am\_UGT85A13 compared to the authentic standard ((Z)-3-hexenol).

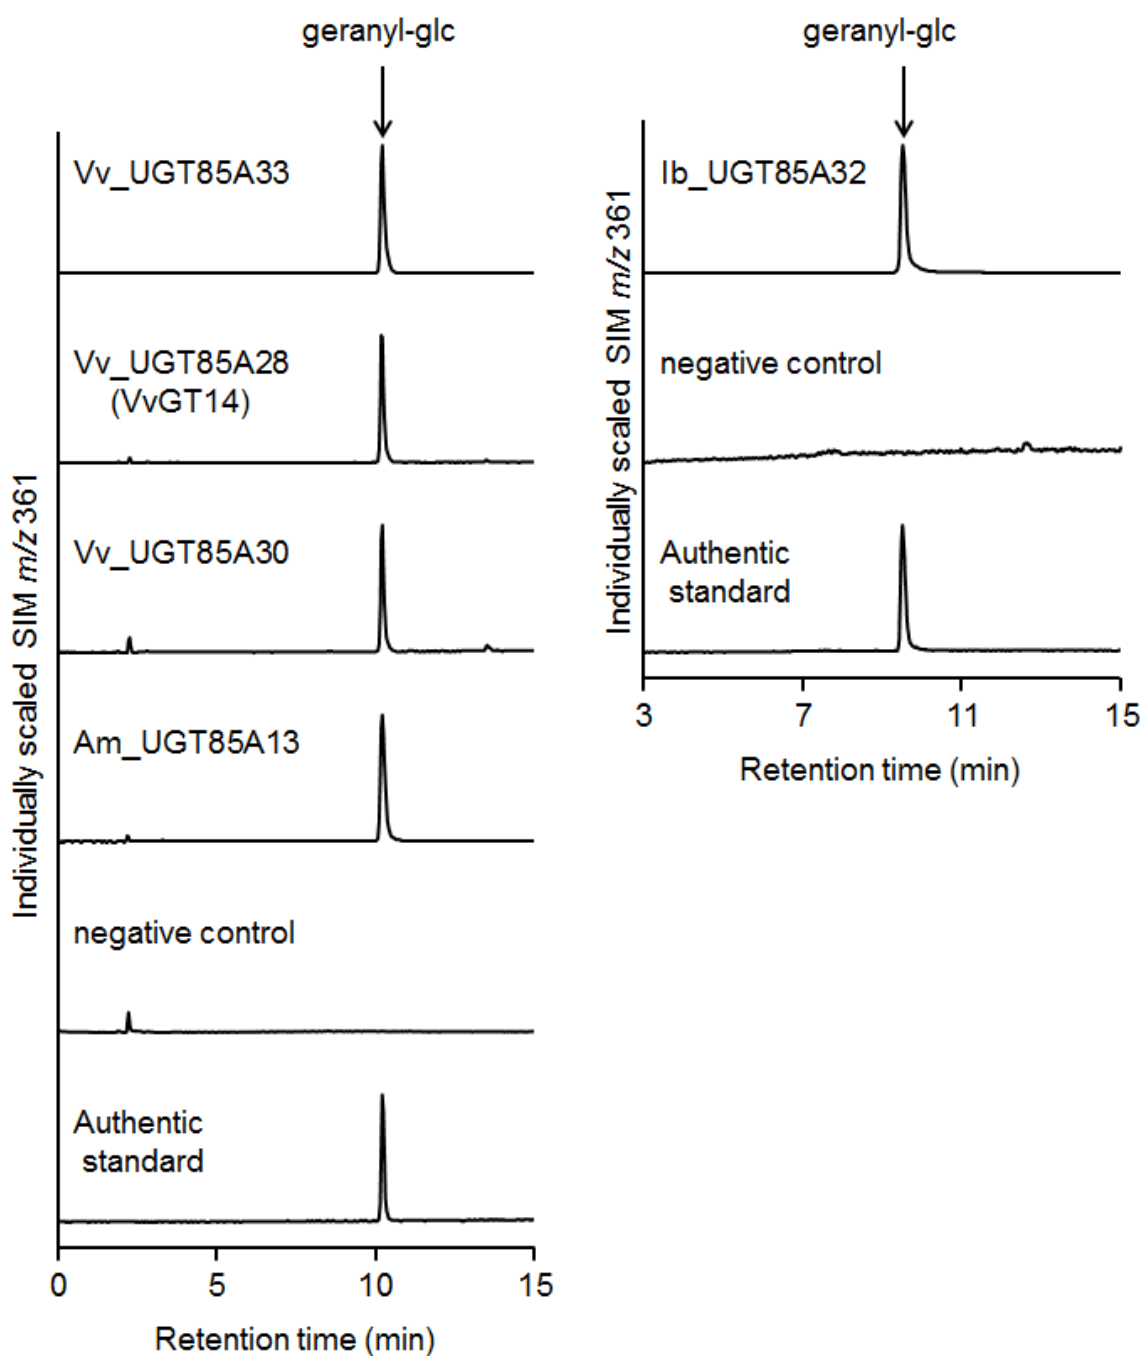

**Supplemental Figure S3. Enzymatic activity of CsGT1 homologs for geraniol.** *In vitro* characterization of UGT85As toward geraniol with grapevine (*Vitis vinifera*: Vv\_UGT85A33, Vv\_UGT85A28, Vv\_UGT85A30), sweet potato (*Ipomoea batatas*: Ib\_UGT85A32), snapdragon (*Antirrhinum majus*: Am\_UGT85A13). LC-MS analysis of the enzymatic product of Vv\_UGT85A33, Vv\_UGT85A28, Vv\_UGT85A30 and Am\_UGT85A13 and Ib\_UGT85A32 compared to the authentic standard (geranyl-glu).

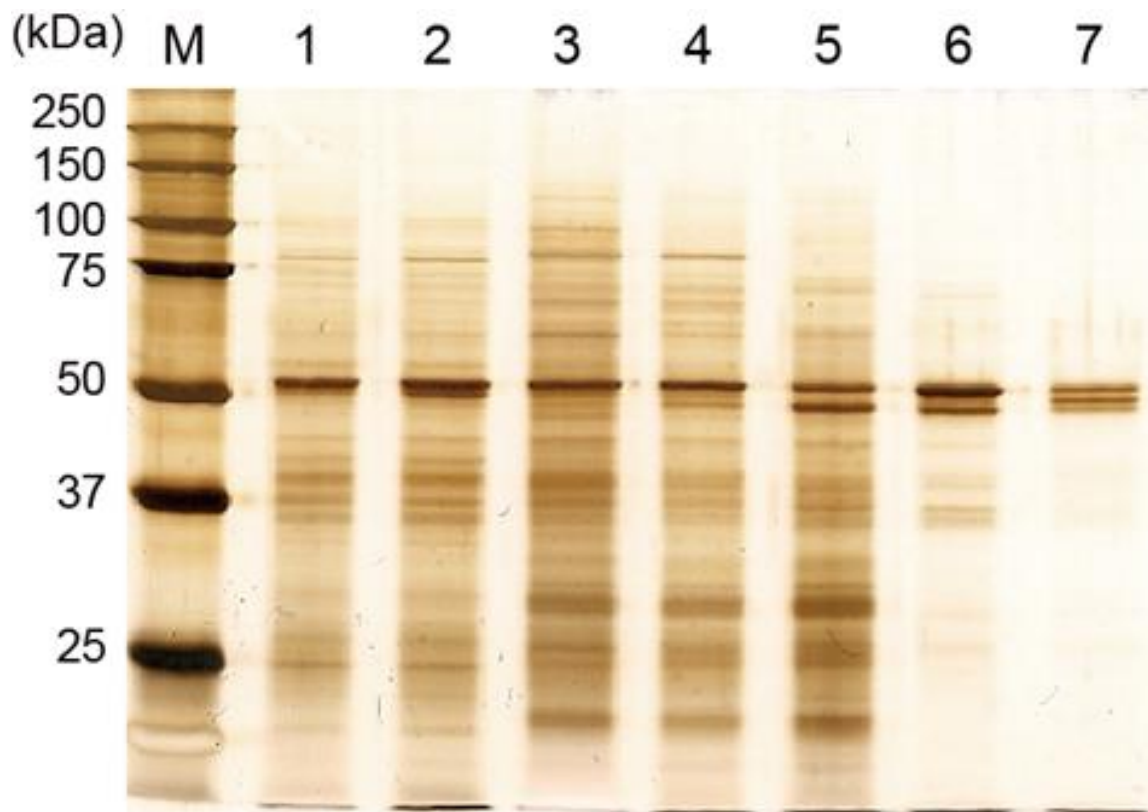

**Supplemental Figure S4. Purified enzymes catalyzing the second xylosyltransferase (CsGT2).** SDS-PAGE analysis of each active fraction obtained from purification steps. Lane 1; crude enzyme, lane 2; ammonium sulfate, lane 3; HiTrap DEAE FF, lane 4; HiTrap Q FF, lane 5; Macro-prep Ceramic Hydroxyapatite Type III, lane 6; HiTrap Blue HP, lane 7; Mono Q 5/50 GL. SDS-PAGE was stained by a silver staining method (Sil-best stain one, Nacalai, Kyoto, Japan)

A)

| Sequence                    | Charge | Observed <i>m/z</i> | <i>Mr</i> (Calc) |
|-----------------------------|--------|---------------------|------------------|
| FPEVEKVELEEEALPK            | +3     | 586.3224            | 1755.9294        |
| GLVVEGWAPQAR                | +2     | 641.852             | 1281.6829        |
| EEIEEIAHGLELSMVNFIWVRFPEVEK | +4     | 840.4036            | 3357.6948        |

B)

1 ENEHSEIIQW LDNKGEYSTL FVSEFGSEYFM SK**EEIEEIAH** **GLELSMVNFI**  
 51 **WVRFPEVEK** **VELEEALPKG** FIDRVGERGL **VVEGWAPQAR** ILTHSSTGGF  
 101 VSHCEWNSVL ESLKFGVPMV AIPMQYEQPL NAKLVEEVGV AAEVNRDING  
 151 RLNREEIAQV IRKVVVEKSG EDIRIKARIF GDKIRMGDE EIDEAVEVLL  
 201 QLCKDVKLLK NSNFIEIFKW VEKVFYFYFI LFYWVVWYTN SLIRLYTSRR  
 251 STNIVFDHVV LVLDLVALFF IYIYRFTIIG VIVSSFCSID TGGILNMV

**Supplemental Figure S5. Partial peptide sequence of the CsGT2.** LC-MS/MS analysis of the partial peptide sequences of CsGT2 (UGT94P1) that purified from tea leaves. A) Three peptide sequences were exactly identified with tea EST database contig 13. B) Predicted amino acid sequence of tea EST database contig 134. Red letters show identical peptides with tea EST database and LC-MS/MS analytical results.

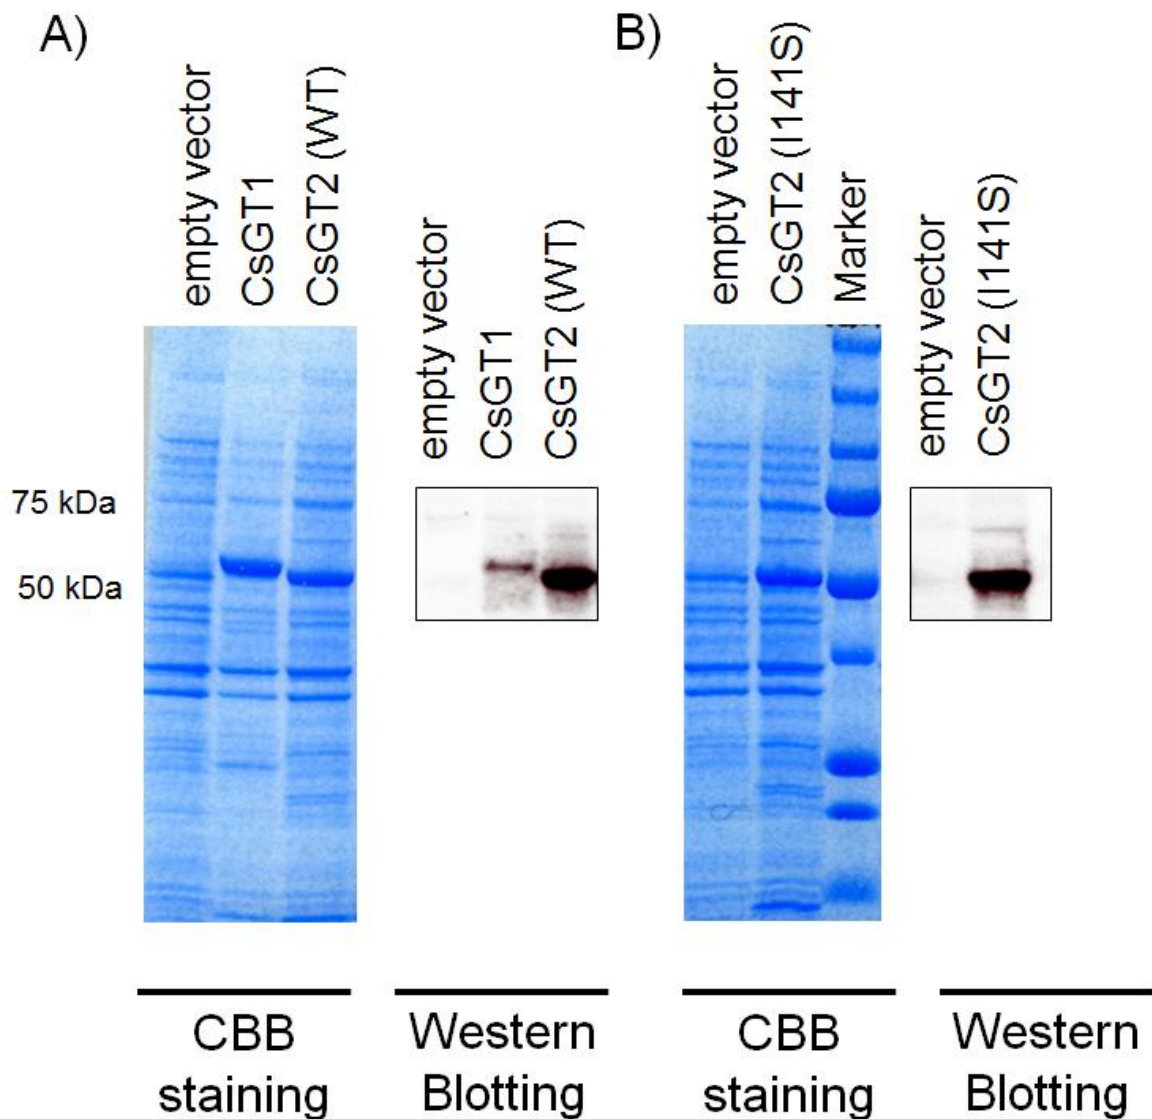

**Supplemental Figure S6. Recombinant proteins of a series of CsGTs.** Specific bands responsible of CsGT1 and CsGT2 (A), and CsGT2-I141S proteins (B) were detected around the size marker of 50kDa in SDS-PAGE, are roughly consistent with the estimated molecular size of CsGT1 (55.7 kDa) and CsGT2 (51.1 kDa), respectively. These specific bands were immunologically confirmed to be the recombinant CsGTs by Western blotting analysis.

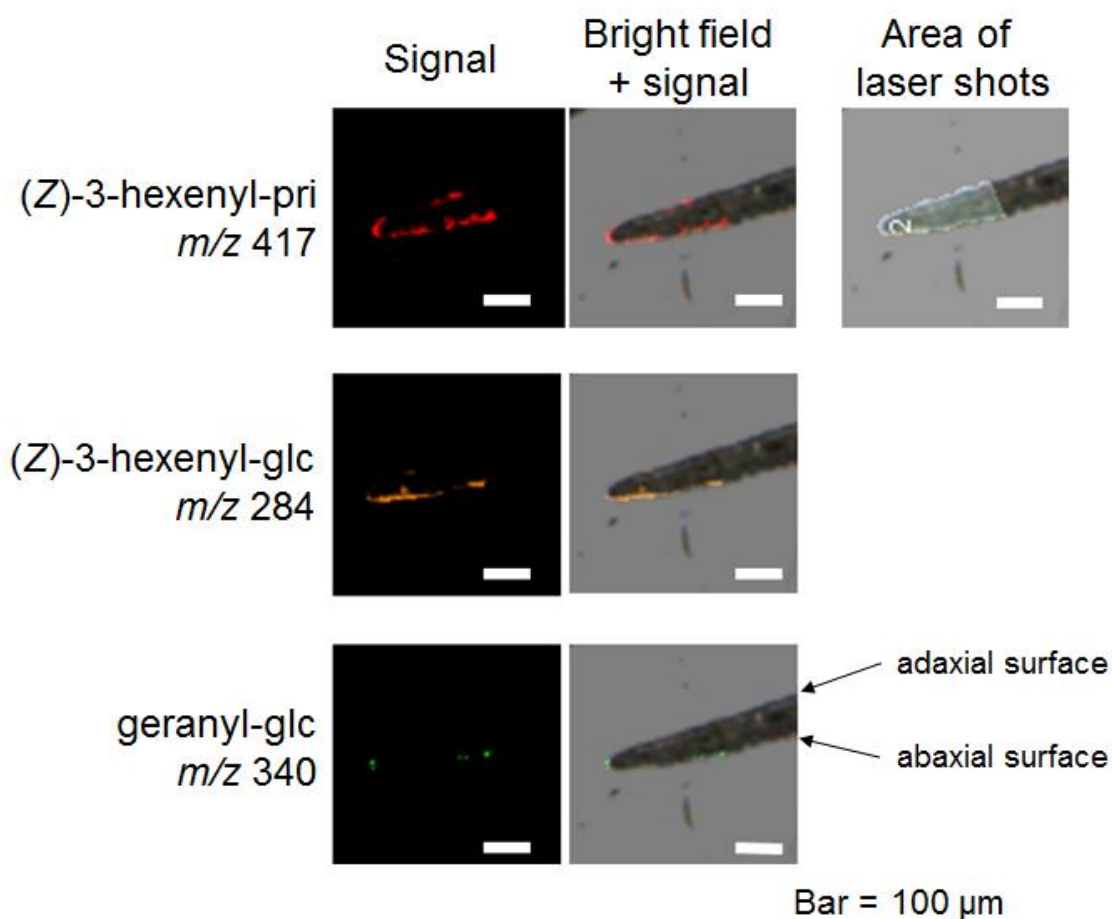

**Supplemental Figure S7. Imaging MS of young fresh leaves of *C.sinensis*.** Specific signal (red; *m/z* 417) corresponding to (Z)-3-hexenyl-pri. Specific signal (orange; *m/z* 284) corresponding to (Z)-3-hexenyl-glc. Specific signal (green; *m/z* 340) corresponding to geranyl-glc.

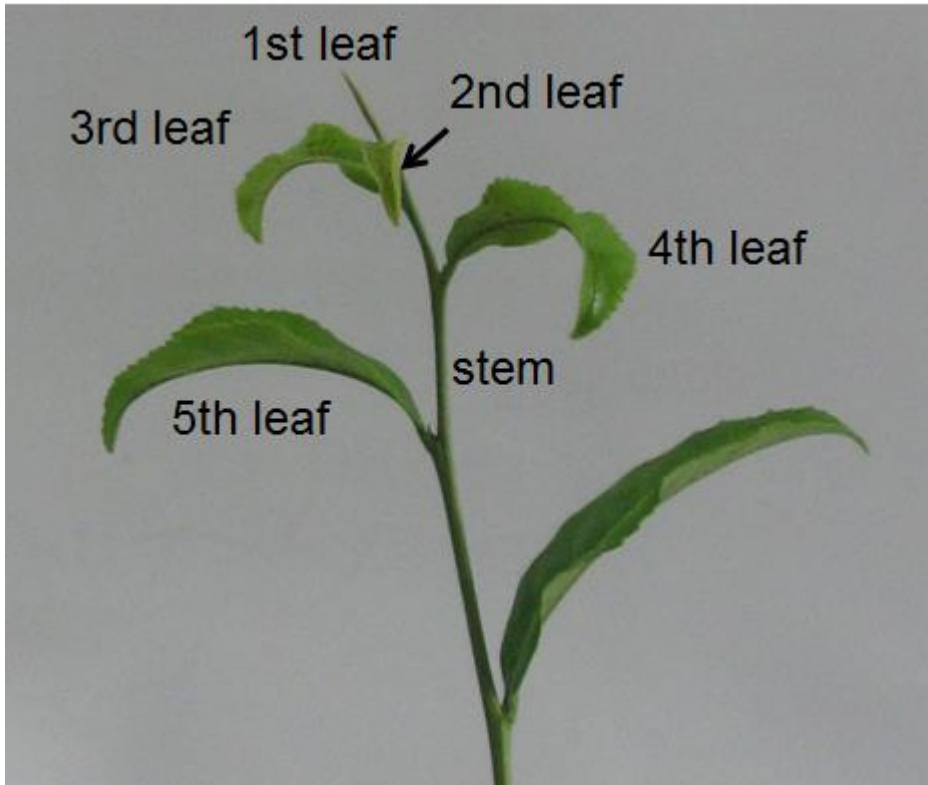

**Supplemental Figure S8.** Harvesting individual tissues for quantification of endogenous aroma glycosides and quantitative real-time PCR (qRT-PCR) of CsGTs and  $\beta$ -PD. The young and mature developmental stages of leaves and stems were defined as follows: young leaves, which are the first, second, and third leaves (plucking part for high grade tea products); mature leaves, which are the fourth and fifth leaves; stem, which are green young non-lignified part between the 3rd leaf and 5th leaf; branch, which are brown lignified old part.



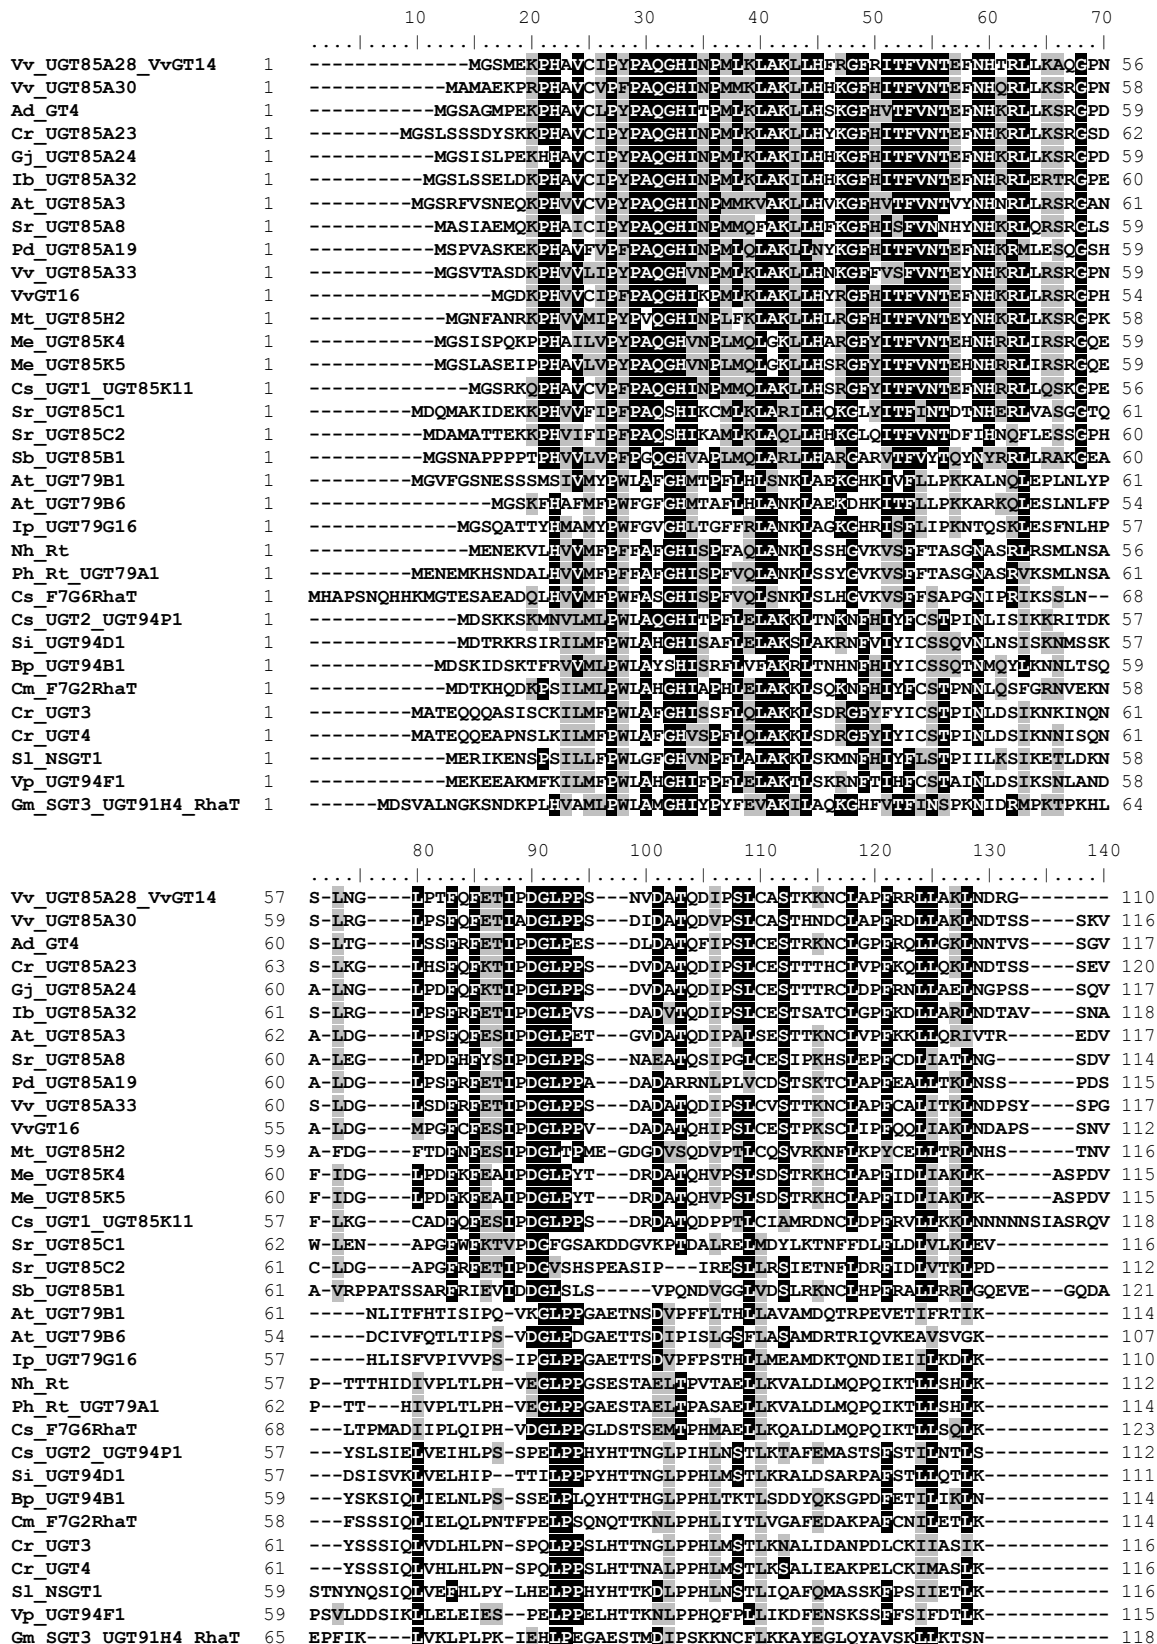

**Supplemental Figure S9.** Multiple sequence alignment of protein sequences of UGT-glucosyltransferase OG2 and OG8 family. The alignment was performed using ClustalW2.1.



|                      | 290 | 300    | 310         | 320      | 330        | 340        | 350       |       |       |      |      |      |      |      |      |    |       |      |      |      |    |    |     |   |   |     |    |    |    |   |    |   |   |   |     |     |     |     |     |   |     |   |   |    |     |   |   |   |   |   |   |   |   |     |
|----------------------|-----|--------|-------------|----------|------------|------------|-----------|-------|-------|------|------|------|------|------|------|----|-------|------|------|------|----|----|-----|---|---|-----|----|----|----|---|----|---|---|---|-----|-----|-----|-----|-----|---|-----|---|---|----|-----|---|---|---|---|---|---|---|---|-----|
| Vv UGT85A28_VvGT14   | 245 | P-IYTI | GPIQLLPDQI  | THD----  | SELKLGISN  | LWKKEE     | PECLK     | WLD   | SKEE  | NSV  | VVYV | NFGS | -ITV | MT   | PQ   | QI | 307   |      |      |      |    |    |     |   |   |     |    |    |    |   |    |   |   |   |     |     |     |     |     |   |     |   |   |    |     |   |   |   |   |   |   |   |   |     |
| Vv UGT85A30          | 251 | P-IYTI | GPIQLLNQMP  | D----    | NDLKSIE    | SNLWKE     | EPGCL     | EWLDA | KEE   | ESV  | VVYV | NFGS | -VT  | MT   | PQ   | QI | 313   |      |      |      |    |    |     |   |   |     |    |    |    |   |    |   |   |   |     |     |     |     |     |   |     |   |   |    |     |   |   |   |   |   |   |   |   |     |
| Ad GT4               | 252 | P-IYTI | GPIQLLNQI   | KE----   | ESLKMIG    | SNLWKE     | EPMC      | LEWLN | SKEE  | PKS  | VVYV | NFGS | -IT  | MT   | PQ   | QI | 314   |      |      |      |    |    |     |   |   |     |    |    |    |   |    |   |   |   |     |     |     |     |     |   |     |   |   |    |     |   |   |   |   |   |   |   |   |     |
| Cr UGT85A23          | 255 | P-IYTI | GPIQLLNQVDD | ----     | ESLKVLG    | SNLWKE     | EEPE      | CLWLD | TKD   | ENS  | VVYV | NFGS | -IT  | MT   | ND   | QI | 317   |      |      |      |    |    |     |   |   |     |    |    |    |   |    |   |   |   |     |     |     |     |     |   |     |   |   |    |     |   |   |   |   |   |   |   |   |     |
| Gj UGT85A24          | 252 | P-IYTI | GPIQLQKEVKD | ----     | ERLSVLG    | SNLWKE     | EEPE      | CLD   | WLD   | SKD  | ENS  | VVYV | NFGS | -IT  | MT   | PQ | QI    | 314  |      |      |    |    |     |   |   |     |    |    |    |   |    |   |   |   |     |     |     |     |     |   |     |   |   |    |     |   |   |   |   |   |   |   |   |     |
| Ib UGT85A32          | 253 | P-VYAV | GPIQLQTVKD  | ----     | SNVRALAS   | NLWKE      | DTSC      | LEWLD | TKD   | ENS  | VVYV | NFGS | -IT  | MT   | PD   | QI | 315   |      |      |      |    |    |     |   |   |     |    |    |    |   |    |   |   |   |     |     |     |     |     |   |     |   |   |    |     |   |   |   |   |   |   |   |   |     |
| At UGT85A3           | 252 | P-VVPI | GPIHLLVNR   | EIEE--   | DSEIGRM    | GSNLWKE    | EETE      | CLQ   | WLN   | TKSR | NS   | VVYV | NFGS | -IT  | MT   | TA | QI    | 316  |      |      |    |    |     |   |   |     |    |    |    |   |    |   |   |   |     |     |     |     |     |   |     |   |   |    |     |   |   |   |   |   |   |   |   |     |
| Sr UGT85A8           | 249 | Q-IYTI | GPIHMMQ-Q   | YVDH--   | DERLKH     | IGSNLWKE   | EDV       | SCIN  | WLD   | TKD  | ENS  | VVYV | NFGS | -IT  | MT   | KE | QI    | 312  |      |      |    |    |     |   |   |     |    |    |    |   |    |   |   |   |     |     |     |     |     |   |     |   |   |    |     |   |   |   |   |   |   |   |   |     |
| Pd UGT85A19          | 250 | P-IYSI | GPIQLPYSE   | IPSE--   | YNDLKA     | IGSNLW     | AE        | TECL  | NWLD  | TKD  | ENS  | VVYV | NFGS | -IT  | MT   | NE | QI    | 314  |      |      |    |    |     |   |   |     |    |    |    |   |    |   |   |   |     |     |     |     |     |   |     |   |   |    |     |   |   |   |   |   |   |   |   |     |
| Vv UGT85A33          | 253 | P-VYSI | GPIQHLVDQ   | ISD----  | DRLKSMG    | SNLWKE     | QTD       | CLQ   | WLD   | SKEE | NS   | VVYV | NFGS | -IT  | MT   | SQ | QI    | 315  |      |      |    |    |     |   |   |     |    |    |    |   |    |   |   |   |     |     |     |     |     |   |     |   |   |    |     |   |   |   |   |   |   |   |   |     |
| VvGT16               | 248 | T-ICTV | GPIPLLNQI   | PPD----  | NSIESNL    | WREETE     | CLQ       | WLN   | SKD   | ENS  | VVYV | NFGS | -IT  | MT   | PE   | QI | 308   |      |      |      |    |    |     |   |   |     |    |    |    |   |    |   |   |   |     |     |     |     |     |   |     |   |   |    |     |   |   |   |   |   |   |   |   |     |
| Mt UGT85H2           | 251 | S-IYPI | GPIPSLLKQ   | TPQ----  | IHQLD      | SLSN       | LWKE      | DETE  | CLD   | WLE  | SKEE | NS   | VVYV | NFGS | -IT  | MT | PE    | QI   | 314  |      |    |    |     |   |   |     |    |    |    |   |    |   |   |   |     |     |     |     |     |   |     |   |   |    |     |   |   |   |   |   |   |   |   |     |
| Me UGT85K4           | 250 | KNIY   | TVGPFIL     | LEKGI    | PEI----    | KSKAFRS    | SLWKE     | DLSC  | LEWLD | KRE  | ES   | VVYV | NFGS | -VT  | IT   | NE | QI    | 313  |      |      |    |    |     |   |   |     |    |    |    |   |    |   |   |   |     |     |     |     |     |   |     |   |   |    |     |   |   |   |   |   |   |   |   |     |
| Me UGT85K5           | 250 | KNIY   | TVGPFIL     | LEKGI    | PEI----    | KSKAFRS    | SLWKE     | DLSC  | LEWLD | KRE  | ES   | VVYV | NFGS | -VT  | IT   | NE | QI    | 313  |      |      |    |    |     |   |   |     |    |    |    |   |    |   |   |   |     |     |     |     |     |   |     |   |   |    |     |   |   |   |   |   |   |   |   |     |
| Cs UGT1 UGT85K11     | 253 | N-IYTI | GPIQLLNQV   | VIDG---- | EFKLNS     | LWKE       | DTK       | CLQ   | WLD   | TKD  | ENS  | VVYV | NFGS | -IT  | MT   | DQ | QI    | 315  |      |      |    |    |     |   |   |     |    |    |    |   |    |   |   |   |     |     |     |     |     |   |     |   |   |    |     |   |   |   |   |   |   |   |   |     |
| Sr UGT85C1           | 252 | N-VYTI | GPIQLLNK    | ITQ      | KETNN--    | DSYSLN     | WKEE      | PE    | VE    | WLN  | SKEE | NS   | VVYV | NFGS | -L   | AV | SL    | QI   | 314  |      |    |    |     |   |   |     |    |    |    |   |    |   |   |   |     |     |     |     |     |   |     |   |   |    |     |   |   |   |   |   |   |   |   |     |
| Sr UGT85C2           | 246 | H-IYTI | GPIQLLDQ    | IP       | EEKKQ      | GITS       | LWKE      | ET    | V     | KEE  | PE   | CF   | WLN  | OS   | SKEE | NS | VVYV  | NFGS | -T   | IT   | NE | QI | 313 |   |   |     |    |    |    |   |    |   |   |   |     |     |     |     |     |   |     |   |   |    |     |   |   |   |   |   |   |   |   |     |
| Sb UGT85B1           | 257 | P-IYTV | GPIAEV      | IAS      | SDSAS--    | AGLAAM     | D         | IS    | Q     | ED   | TR   | CL   | S    | WLD  | CR   | P  | A     | S    | VVYV | NFGS | -M | AV | MT  | A | Q | 321 |    |    |    |   |    |   |   |   |     |     |     |     |     |   |     |   |   |    |     |   |   |   |   |   |   |   |   |     |
| At UGT79B1           | 242 | KPVY   | LTG----     | PVLP     | GSQP----   | NQPSLD     | P         | Q     | W     | A    | E    | W    | A    | K    | F    | N  | H     | G    | S    | VV   | F  | C  | A   | F | G | S   | -Q | P  | V  | N | K  | I | D | Q | 295 |     |     |     |     |   |     |   |   |    |     |   |   |   |   |   |   |   |   |     |
| At UGT79B6           | 225 | RKVL   | LTG----     | PML      | PEPDN----  | SKP-LE     | D         | Q     | W     | R    | Q    | W    | L    | S    | K    | F  | D     | E    | G    | S    | V  | I  | C   | A | F | G   | S  | -Q | I  | L | L  | E | K | D | Q   | 276 |     |     |     |   |     |   |   |    |     |   |   |   |   |   |   |   |   |     |
| Ip UGT79G16          | 236 | KPVLL  | AG----      | PAL      | PVP----    | SKSTME     | Q         | K     | W     | S    | D    | W    | L    | G    | K    | F  | K     | E    | G    | S    | V  | I  | C   | A | F | G   | S  | -E | C  | T | L  | R | K | D | K   | F   | Q   | 286 |     |   |     |   |   |    |     |   |   |   |   |   |   |   |   |     |
| Nh Rt                | 240 | KPVLL  | AG----      | PV       | -PDPP----  | SGK-LE     | E         | K     | W     | D    | A    | W    | L    | N    | K    | F  | E     | A    | G    | T    | V  | I  | C   | S | F | G   | S  | -E | E  | T | L  | K | D | D | Q   | I   | K   | 290 |     |   |     |   |   |    |     |   |   |   |   |   |   |   |   |     |
| Ph Rt UGT79A1        | 242 | KPV    | FSNR----    | TR       | S-GPA----  | SGK-LE     | E         | K     | W     | A    | T    | W    | L    | N    | K    | F  | E     | G    | T    | V    | I  | C  | S   | F | G | S   | -E | E  | T  | L | T  | D | D | Q | 292 |     |     |     |     |   |     |   |   |    |     |   |   |   |   |   |   |   |   |     |
| Cs F7G6RhaT          | 248 | KPVLL  | AG----      | PL       | VNPEPP---- | SGE-LE     | E         | R     | W     | A    | N    | W    | L    | G    | K    | F  | E     | G    | S    | V    | I  | C  | S   | F | G | S   | -E | E  | T  | L | T  | D | D | Q | 299 |     |     |     |     |   |     |   |   |    |     |   |   |   |   |   |   |   |   |     |
| Cs UGT2 UGT94P1      | 227 | KRVV   | PVG----     | PL       | VQIDD----  | DE-NE      | H         | S     | E     | I    | I    | Q    | W    | L    | N    | K  | G     | E    | S    | T    | L  | F  | V   | S | F | G   | S  | -E | Y  | F | M  | S | K | E | E   | I   | E   | 278 |     |   |     |   |   |    |     |   |   |   |   |   |   |   |   |     |
| Si UGT94D1           | 225 | KRFV   | PVG----     | PL       | VQVGC----  | DMENE      | G         | N     | D     | I    | E    | W    | L    | D    | G    | R  | R     | S    | A    | V    | F  | S  | S   | F | G | S   | -E | Y  | F  | L | S  | N | E | E | I   | E   | 277 |     |     |   |     |   |   |    |     |   |   |   |   |   |   |   |   |     |
| Bp UGT94B1           | 223 | KRV    | PVG----     | PL       | VQEASL---- | LQ-DD      | H         | I     | W     | I    | M    | K    | W    | L    | D    | K  | K     | E    | S    | S    | V  | V  | F   | V | F | G   | S  | -E | Y  | L | S  | N | E | I | E   | 274 |     |     |     |   |     |   |   |    |     |   |   |   |   |   |   |   |   |     |
| Cm F7G2RhaT          | 228 | NEI    | PVG----     | PL       | IQEP----   | TFKVD      | D         | T     | K     | I    | M    | D    | W    | L    | S    | O  | K     | E    | E    | R    | S  | V  | V   | A | S | F   | G  | S  | -E | Y | F  | P | S | T | D   | E   | I   | H   | 278 |   |     |   |   |    |     |   |   |   |   |   |   |   |   |     |
| Cr UGT3              | 231 | SKV    | PV          | CVIS     | -LNN       | NDQG----   | QGNK      | D     | E     | E    | I    | I    | Q    | W    | L    | K  | K     | S    | H    | R    | S  | V  | V   | F | S | F   | G  | S  | -E | Y | F  | L | N | Q | E   | E   | I   | E   | 286 |   |     |   |   |    |     |   |   |   |   |   |   |   |   |     |
| Cr UGT4              | 235 | RKM    | PV          | CLANS    | PD         | NNNHQE---- | QSNK      | D     | G     | D    | E    | L    | I    | Q    | W    | L  | E     | T    | K    | S    | E  | R  | S   | V | V | F   | S  | F  | G  | S | -E | Y | F | L | N   | Q   | E   | E   | I   | E | 291 |   |   |    |     |   |   |   |   |   |   |   |   |     |
| Sl NSGT1             | 233 | KELI   | P           | GPI      | I          | REAM       | IDEEE---- | DWGT  | I     | Q    | S    | W    | L    | D    | K    | K  | D     | Q    | L    | S    | C  | V  | V   | V | S | F   | G  | S  | -E | S | F  | L | S | K | Q   | E   | I   | E   | 285 |   |     |   |   |    |     |   |   |   |   |   |   |   |   |     |
| Vp UGT94F1           | 225 | KQI    | P           | T        | G          | -----      | LLIAN     | ----- | SDE   | K    | D    | E    | P    | E    | I    | M  | Q     | W    | L    | D    | E  | K  | S   | E | R | S   | T  | V  | V  | I | S  | F | G | S | -E  | C   | F   | L   | S   | K | Q   | E | I | E  | 274 |   |   |   |   |   |   |   |   |     |
| Gm SGT3 UGT91H4_RhaT | 243 | VV     | VV          | PV       | G          | L          | P         | P     | S     | M    | Q    | I    | R    | D    | V    | E  | ----- | EED  | N    | N    | P  | D  | W   | V | R | I   | K  | D  | W  | L | D  | T | E | S | S   | V   | V   | V   | I   | C | F   | G | S | -E | L   | K | L | S | Q | E | D | I | T | 301 |

|                    | 360 | 370  | 380   | 390   | 400 | 410 | 420 |   |   |   |   |     |   |   |   |      |      |      |      |   |      |      |   |   |   |   |   |   |   |      |      |      |      |      |      |   |    |   |   |   |   |   |   |   |   |   |   |   |   |   |   |   |     |     |     |     |     |     |     |
|--------------------|-----|------|-------|-------|-----|-----|-----|---|---|---|---|-----|---|---|---|------|------|------|------|---|------|------|---|---|---|---|---|---|---|------|------|------|------|------|------|---|----|---|---|---|---|---|---|---|---|---|---|---|---|---|---|---|-----|-----|-----|-----|-----|-----|-----|
| Vv UGT85A28_VvGT14 | 308 | EFAW | GLANS | NQ    | S   | F   | L   | W | I | R | P | D   | L | V | S | G    | ---- | ES   | A    | I | L    | P    | P | E | V | A | E | T | E | D    | ---- | R    | G    | L    | L    | A | G  | W | C | P | O | E | V | L | T | H | O | A | I | G | G | F | L   | 369 |     |     |     |     |     |
| Vv UGT85A30        | 314 | EFAW | GLANS | NK    | F   | L   | W   | I | R | P | D | L   | V | A | G | ---- | DA   | A    | I    | L | P    | A    | D | E | V | A | Q | T | K | E    | ---- | R    | S    | L    | L    | A | S  | W | C | P | O | E | V | L | T | H | P | A | I | G | G | F | L   | 375 |     |     |     |     |     |
| Ad GT4             | 315 | EFAW | GLANS | NQ    | S   | F   | L   | W | I | R | P | D   | L | V | G | ---- | ES   | A    | V    | L | P    | P    | E | V | A | V | T | K | E | ---- | R    | G    | M    | L    | A    | S | W  | A | P | O | E | V | L | T | H | S | S | V | G | G | F | L | 376 |     |     |     |     |     |     |
| Cr UGT85A23        | 318 | EFAW | GLANS | S     | K   | Q   | F   | L | W | I | R | P   | D | L | I | S    | G    | ---- | ES   | S | I    | L    | G | E | E | V | E | E | T | K    | E    | ---- | R    | G    | L    | I | A  | S | W | C | H | O | E | V | I | N | H | P | A | I | G | G | F   | L   | 379 |     |     |     |     |
| Gj UGT85A24        | 315 | EFAW | GLANS | S     | K   | Q   | F   | L | W | I | R | P   | D | L | V | S    | G    | ---- | DS   | A | I    | L    | P | P | E | L | E | E | T | K    | D    | ---- | R    | G    | L    | L | A  | S | W | C | P | O | E | V | L | T | H | S | P | A | I | G | G   | F   | L   | 376 |     |     |     |
| Ib UGT85A32        | 316 | EFAW | GLANS | S     | K   | K   | F   | L | W | I | R | P   | D | L | V | T    | G    | ---- | E    | A | A    | I    | P | P | E | L | E | E | T | K    | D    | ---- | R    | G    | M    | S | S  | W | C | S | O | E | V | L | N | H | P | A | I | G | G | F | L   | 377 |     |     |     |     |     |
| At UGT85A3         | 317 | EFAW | GLA   | A     | T   | K   | E   | F | L | W | M | R   | D | S | V | A    | G    | ---- | E    | E | A    | V    | P | K | E | L | A | E | T | A    | D    | ---- | R    | R    | M    | L | T  | S | W | C | P | O | E | V | L | T | H | S | P | A | I | G | G   | F   | L   | 378 |     |     |     |
| Sr UGT85A8         | 313 | EFG  | W     | GLANS | S   | K   | K   | D | F | L | W | I   | R | P | D | I    | V    | G    | ---- | N | E    | A    | M | P | A | E | L | E | E | T    | K    | E    | ---- | R    | G    | M | V  | T | S | W | C | S | O | E | V | L | K | H | P | S | I | G | V   | F   | L   | 374 |     |     |     |
| Pd UGT85A19        | 315 | EFS  | W     | GLANS | S   | K   | K   | F | L | W | I | R   | P | D | L | V    | T    | G    | ---- | E | A    | V    | V | P | P | E | L | E | E | T    | K    | E    | ---- | R    | G    | M | L  | A | S | W | C | P | O | E | V | L | T | H | S | P | A | I | G   | G   | F   | L   | 376 |     |     |
| Vv UGT85A33        | 316 | EFAW | GLANS | S     | N   | K   | F   | L | W | I | R | P   | D | L | V | G    | ---- | DS   | A    | I | L    | P    | P | E | V | T | E | T | K | D    | ---- | R    | G    | M    | L    | A | S  | W | C | P | O | E | V | L | K | H | P | A | I | G | G | F | L   | 377 |     |     |     |     |     |
| VvGT16             | 309 | EFAW | GLANS | S     | H   | K   | F   | L | W | I | R | P   | D | L | V | G    | ---- | DS   | V    | I | L    | P    | P | E | V | N | E | T | I | Q    | ---- | R    | G    | L    | M    | A | G  | W | C | P | O | E | V | L | N | H | P | S | V | G | G | F | L   | 370 |     |     |     |     |     |
| Mt UGT85H2         | 315 | EFAW | GLANS | C     | K   | S   | F   | L | W | I | R | P   | D | L | V | I    | G    | ---- | GS   | V | I    | F    | S | S | E | T | N | E | I | A    | D    | ---- | R    | G    | L    | I | A  | S | W | C | P | O | D | R | V | L | N | H | P | S | I | G | G   | F   | L   | 376 |     |     |     |
| Me UGT85K4         | 314 | EFAW | GLANS | S     | K   | H   | F   | L | W | I | R | P   | D | V | V | M    | G    | ---- | ES   | A | V    | L    | P | P | E | V | E | E | T | K    | D    | ---- | R    | G    | L    | L | V  | S | W | C | P | O | D | R | V | L | O | H | P | A | V | G | V   | F   | L   | 375 |     |     |     |
| Me UGT85K5         | 314 | EFAW | GLANS | S     | K   | H   | F   | L | W | I | R | P   | D | V | V | M    | G    | ---- | ES   | A | V    | L    | P | P | E | V | E | A | L | K    | D    | ---- | R    | G    | L    | L | V  | S | W | C | P | O | D | R | V | L | O | H | P | A | V | G | V   | F   | L   | 375 |     |     |     |
| Cs UGT1 UGT85K11   | 316 | EFAW | GLANS | S     | K   | H   | F   | L | W | I | R | P   | D | I | V | M    | G    | ---- | DS   | A | I    | L    | P | P | E | V | E | E | T | K    | D    | ---- | R    | G    | L    | L | V  | S | W | C | P | O | E | V | L | S | H | P | S | I | G | V | F   | L   | 377 |     |     |     |     |
| Sr UGT85C1         | 315 | EFG  | W     | GLV   | N   | S   | N   | H | F | L | W | I   | R | N | L | I    | D    | G    | ---- | K | P    | A    | V | M | P | O | E | L | K | E    | A    | M    | N    | E    | ---- | K | G  | F | V | G | S | W | C | S | O | E | V | L | N | H | P | A | V   | G   | G   | F   | L   | 376 |     |
| Sr UGT85C2         | 314 | EFG  | W     | GLANS | N   | H   | F   | L | W | I | R | S   | N | L | V | I    | G    | ---- | EN   | A | V    | L    | P | P | E | L | E | H | T | K    | ---- | R    | G    | F    | I    | A | S  | W | C | S | O | E | V | L | K | H | P | S | V | G | G | F | L   | 375 |     |     |     |     |     |
| Sb UGT85B1         | 322 | EFA  | L     | G     | L   | S   | C   | G | S | P | F | L   | W | K | R | D    | V    | V    | E    | G | ---- | E    | E | V | L | P | E | A | L | D    | E    | V    | A    | R    | ---- | G | R  | L | V | V | P | W | C | P | O | A | A | V | L | K | H | A | A   | V   | G   | L   | E   | V   | 384 |
| At UGT79B1         | 296 | E    | L     | C     | L   | E   | S   | T | G | F | P | L   | V | A | I | K    | P    | S    | G    | V | S    | ---- | T | V | E | A | L | P | E | G    | R    | V    | Q    | ---- | G    | R | -G | V | V | F | G | W | I | Q | P | I | V | L | N | H | P | S | V   | G   | C   | F   | V   | 359 |     |
| At UGT79B6         | 277 | E    | L     | C     | L   | E   | M   | E | L | T | G | L</ |   |   |   |      |      |      |      |   |      |      |   |   |   |   |   |   |   |      |      |      |      |      |      |   |    |   |   |   |   |   |   |   |   |   |   |   |   |   |   |   |     |     |     |     |     |     |     |
