# Supplementary material
Source: PubMed Central journal article supplement (PMC4453793)
Supplement: supp_pp.15.00403_00403suppMM.pdf [file supp_pp.15.00403_00403suppMM.pdf]

## Supplemental Materials and Methods

### LC-MS conditions for quantification of endogenous aroma glycosides in *C. sinensis*.

LC-MS analysis of ten aroma glycosidic precursors was performed on LCMS-2010A system (Shimadzu; [www.shimadzu.com](http://www.shimadzu.com)) equipped with Capcell Pak UG120 C<sub>18</sub> reversed phase column (2.0 mm i.d. x 150 mm, 5 μm, Shiseidou; [hplc.shiseido.co.jp/e](http://hplc.shiseido.co.jp/e)) and electrospray operating conditions were used the followings: dry gas 1.5 l/min, capillary voltage 1.5 kV, dry gas temperature 250°C. The endogenous aroma glycosides were quantified with the SIM negative mode. For benzyl-glc, benzyl-pri, 2PE-glc, 2PE-pri, (*Z*)-3-hexenyl-glc and (*Z*)-3-hexenyl-pri, the glycosidic fractions of were subjected to the LC-MS using gradient elution with aqueous formic acid (0.1%,v/v) as solvent A and acetonitrile as solvent B at a flow rate of 0.2 ml/min at 40°C. The gradient condition started with isocratic conditions of 16% of solvent B for 5 min and then increased up to 29% of solvent B for 24.5 min. The *m/z* 293 ion for benzyl-glc (*tR* 10.5 min), the *m/z* 425 ion for benzyl-pri (*tR* 14.9 min) the *m/z* 307 ion for 2PE-glc (*tR* 18.3 min), the *m/z* 439 ion for 2PE-pri (*tR* 22.4 min) The *m/z* 285 ion for (*Z*)-3-hexenyl-glc (*tR* 21.6 min), the *m/z* 417 ion for (*Z*)-3-hexenyl-pri (*tR* 26.3 min) and the *m/z* 456 ion for *p*NP-pri (*tR* 8.2 min) as a internal standard. For geranyl-glc, geranyl-pri, linalyl-glc and linalyl-pri, the glycosidic fractions of were subjected to the LC-MS using gradient elution with aqueous formic acid (0.1%,v/v) as solvent A and acetonitrile as solvent B at a flow rate of 0.2 ml/min at 40°C. The gradient condition started with 7% of solvent B then increased up to 30% of solvent B for 4 min and keep 30% of solvent B for 13 min. The *m/z* 339 ion for geranyl-glc (*tR* 14.5 min) and linalyl-glc (*tR* 13.0 min), and the *m/z* 471 ion for geranyl-pri (*tR* 11.9 min) and linalyl-glc (*tR* 11.0 min)

### Enzyme purification of a xylosyltransferase specific for monoglucoside-bound

## **volatiles**

The enzyme solution was applied to a HiTrap DEAE FF (5 ml, GE Healthcare) equilibrated with buffer B and eluted by a linear gradient of NaCl (0 to 340 mM) of buffer B. The active fraction was equilibrated with buffer C using an Amicon Ultra-15 centrifugal filter device (Mr 30,000 cutoff; Millipore). Then, the enzyme fraction was applied to a HiTrap Q FF (5 ml, GE Healthcare) and eluted with a linear gradient of NaCl (0 to 1 M) of buffer C. The active fractions was equilibrated with buffer D and applied to a Macro-prep Ceramic Hydroxyapatite Type III (5ml, Bio-Rad), and eluted with a linear gradient of NaCl (0 to 1 M) in buffer D. The active fraction was equilibrated with buffer E, applied to a HiTrap Blue HP (1 ml, GE Healthcare) and eluted with a linear gradient of NaCl (0 to 2 M) of buffer E. The active fraction was equilibrated with buffer C and applied to a Mono Q 5/50 GL (1 ml, GE Healthcare) and eluted with a linear gradient of NaCl (0 to 1 M) of buffer C. Peptide sequences were analyzed by Nano-LC-TOF MS.

## **Nano-LC-MS/MS analysis of partial peptide sequences of purified CsGT2**

Peptide assignments were performed using an LC-ESI-LIT-q-TOF mass spectrometer equipped with NanoFrontier eLD System (Hitachi High-Technologies, [www.hitachi-hitec.com](http://www.hitachi-hitec.com)) and a nano-flow HPLC, NanoFrontier nLC (Hitachi High-Technologies). The LIT-TOF and CID modes were used for MS detection and peptide fragmentation, respectively. The trypsin-treated sample (10  $\mu$ l) was injected, and the peptides were trapped on a C18 column, Monolith Trap (50  $\mu$ m  $\times$  150 mm, Hitachi High-Technologies). Peptide separation was achieved using a packed nano-capillary column (capillary-Ex nano mono cap, 0.05  $\times$  150 mm, GL Science, Japan) at a flow rate of 200 nl/min. The peptides were eluted using an acetonitrile gradient (A: 2% acetonitrile containing 0.1% formic acid; B: 98% acetonitrile containing 0.1% formic acid; 0 min with A = 98%, B = 2%, followed by 60 min with A = 60%, B = 40%). All peptide mass data were analyzed using

Peaks software (Bioinformatics Solutions Inc., [www.bioinfor.com](http://www.bioinfor.com)) and the MASCOT database (Matrix Science, [www.matrixscience.com](http://www.matrixscience.com)).

### **LC-MS analysis of CsGTs enzymatic products**

Enzymatic reaction mixtures by UGT enzymes were analyzed by LC-MS using Shimadzu LCMS-2010A ([www.shimadzu.com](http://www.shimadzu.com)) system with negative electrospray ionization mode; dry temperature, 250°C; a flow rate, 0.2 ml/min and column oven temperature, 40 °C. HPLC separation was performed according to the following conditions: Analysis of CsGT1 enzymatic products was performed using a CAPCELL PAK C<sub>18</sub> UG120 column (2.0 mm I.D.×150 mm; 5 µm) (Shiseido, [hplc.shiseido.co.jp/e/](http://hplc.shiseido.co.jp/e/)) and elution was started with 15% solvent B, following a linear gradient flow up to 90% in 15 min (solvent A: H<sub>2</sub>O containing 0.05% (v/v) formic acid, B: acetonitrile) Analysis of CsGT2 enzymatic products was performed using a CAPCELL PAK C<sub>18</sub> UG120 column (2.0 mm I.D.×75 mm; 5 µm) (Shiseido) and elution was started with 15% solvent B (0-2 min) following a linear gradient flow up to 60% in 8 min (solvent A: H<sub>2</sub>O containing 0.05% (v/v) formic acid, B: acetonitrile)

### **Subcloning of CsGT1 and CsGT2 to pET15b vector for *E.coli* expression**

The amplified cDNA fragments of CsGT1 and CsGT2 genes were subcloned into pENTR/D-TOPO vector (Life Technologies; [www.lifetechnologies.com](http://www.lifetechnologies.com)), and then digested with *Xho*I and *Bgl*II for CsGT1, and *Nde*I and *Bam*HI for CsGT2 and the resulting DNA fragments were ligated into a pET-15b vector (Merck Millipore; [www.merckmillipore.com](http://www.merckmillipore.com)) previously digested with *Xho*I and *Bam*HI for CsGT1, and *Nde*I and *Bam*HI for CsGT2, respectively. The resulting plasmids were named pET-15b-CsGT1 and pET-15b-CsGT2, which encoded an N-terminal in-frame fusion of CsGT1 and CsGT2, respectively, with a His<sub>6</sub> tag. The inserted fragments were sequenced to confirm the absence of PCR errors and transformed into *E. coli* BL21(DE3) (TOYOBO; [www.toyobo-global.com](http://www.toyobo-global.com)).

### **Subcloning of CsGT2 (I141S) to pET15b vector**

According to the previously published method of Noguchi *et al.* (2007), *in vitro* mutagenesis of the CsGT2 gene was performed using recombinant PCR with the pENTR-Directional-TOPO vector (Life Technologies) containing the wild-type CsGT2 cDNAs as the templates and the specific mutagenic oligonucleotide primer set (CsGT2-134-I141S-FW and CsGT2-134-I141S-Rv) (Supplemental Table S2) to obtain the CsGT2-I141S mutant. The amplified fragment containing the I141S mutation was digested with *NdeI* and *BglII*, and the resulting DNA fragments were ligated with pET-15b at *NdeI* and *BamHI* site as described above. The introduced mutation was verified by DNA sequencing of both strands. The resulting CsGT2-I141S fragment was inserted in the expression vector pET-15b as described above.

### ***E. coli* expression and purification of recombinant CsGT1 and CsGT2**

The transformant cells were precultured at 37°C for 16 hr in a Luria-Bertani broth containing 50 µg/mL ampicillin. Twenty milliliters of the pre-culture was then inoculated into 200 mL, then further incubated at 22°C for 20 hr with Overnight Express Autoinduction System 1 (Merck Millipore) for expression of recombinant proteins. All subsequent operations were conducted at 0 to 4°C. The recombinant *E. coli* cells were harvested by centrifugation (7000g, 15 min), washed with distilled water, and resuspended in buffer F containing 20 mM imidazole. The cells were disrupted at 4°C by five cycles of ultrasonication. The cell debris was removed by centrifugation (7,000g, 15 min). Polyethyleneimine was slowly added to the supernatant solution to a final concentration of 0.12% (v/v). The mixture was allowed to stand at 4°C for 30 min, followed by centrifugation (7,000g, 15 min). The supernatant was applied to a HisTrap HP column (1 mL; GE Healthcare) equilibrated with buffer F containing 20 mM imidazole. The column was washed with buffer F containing 20 mM imidazole, and

the enzyme was eluted with buffer F containing 200 mM imidazole. The active column-bound fractions were concentrated and desalted using Vivaspin 30,000 MWCO (GE Healthcare), followed by substitution with buffer G. The expressed recombinant proteins in the gels were separated by SDS-PAGE and visualized by using PAGE Blue 83 (Cosmo Bio; [www.cosmobio.co.jp/index\\_e](http://www.cosmobio.co.jp/index_e)) and His · Tag monoclonal antibody (mouse, Merck Millipore) and ECL Anti-mouse IgG Horseradish Peroxidase-linked Whole antibody (sheep, GE Healthcare) respectively. Chemical luminescence derived from the recombinant proteins was detected by using Chemi-Lumi One Ultra (Nacalai tesque; [www.nacalai.co.jp/english/](http://www.nacalai.co.jp/english/)) in Molecular Imager ChemiDoc XRS+ (BioRad; [www.bio-rad.com/](http://www.bio-rad.com/))

### **Preparation of cryosections of tea leaf for MS imaging**

For MS imaging analysis, cryosections of the young tea leaf were prepared as described elsewhere. Briefly, tea leaves were embedded in SCEM embedding medium (Leica, [www.leica-microsystems.com](http://www.leica-microsystems.com)) in a Tissue-Tek Cryomold (Sakura Finetek, [www.sakura-finetek.com/](http://www.sakura-finetek.com/)) and desiccated in *vacuo* for 5 min at ambient temperature. The leaves were frozen by placing the mold containing tea leaves embedded in the medium on a block of dry ice for 15 min. Longitudinal sections of the leaves in 5 µm thickness were cut using a cryotome (Cryostar NX70, Thermo Scientific; [www.thermosci.jp](http://www.thermosci.jp)) with blade and block temperatures of -20 and -25 °C, respectively, and the sections were transferred onto a glass slide coated with indium tin oxide (Bruker Daltonics; [www.bruker.jp](http://www.bruker.jp)). The sections were dried in 50 ml tubes containing dried silica gel. The cryosections were uniformly sprayed with a solution of 50 mg/ml dihydrobenzoic acid (DHBA) in 70% methanol containing 0.1% trifluoroacetic acid using a 0.2-mm caliber airbrush (Procon Boy FWA Platinum; Mr. Hobby, Japan), air-dried for 10 min and mounted on a MALDI target plate.

### **MALDI-MS imaging analysis**

Longitudinal sections of seeds were selected for MS imaging analysis, performed by MALDI-TOF-MS/MS (Ultraflextream III, Bruker Daltonics). Parameters of the laser shots were as follows: laser diameter, 15  $\mu\text{m}$ ; raster, 15  $\mu\text{m}$ ; laser power, 3\_mid; laser power boost, 50%. Data from 100 laser shots were obtained at each position using the FlexImaging software program (Bruker Daltonics). The spectra were acquired in the positive mode. For MS/MS analysis, the parent ion of (*Z*)-3-hexenyl-pri ( $m/z$  417), (*Z*)-3-hexenyl- glu ( $m/z$  284) and geranyl-glc ( $m/z$  340) were monitored for a peak tolerance of 0.5 kDa. A cutoff value of 50% was used for the production of the images. The instrument was calibrated in the positive ion mode in the low-mass range using a mixture of selected chemical standards (DHBA and 4-hydroxycinnamic acid) prior to data acquisition. Authentic (*Z*)-3-hexenyl-pri was used as a reference compound. The images of the parent ion were overlaid onto bright-field images of the corresponding leaf sections with the use of FlexImaging software.
