# Supplementary material
Source: PubMed Central journal article supplement (PMC4453793)
Supplement: supp_pp.15.00403_00403supptbls.pdf [file supp_pp.15.00403_00403supptbls.pdf]

## Supplemental Tables

**Supplemental Table S1.** Summary of fresh weight and amounts of aroma  $\beta$ -primeverosides in young leaves and mature leaves of *C.sinensis*.

|             | aroma glycosides ( $\mu\text{g g}^{-1}$ fresh weight) |                  | total amounts of aroma glycosides ( $\mu\text{g}$ ) |                                           |
|-------------|-------------------------------------------------------|------------------|-----------------------------------------------------|-------------------------------------------|
|             | young leaves                                          | mature leaves    | young leaves<br>(FW $0.192 \pm 0.016$ g)            | mature leaves<br>(FW $0.808 \pm 0.057$ g) |
| benzyl-glc  | $0.46 \pm 0.022$                                      | $0.044 \pm 0.01$ | $0.088 \pm 0.008$                                   | $0.036 \pm 0.008$                         |
| 2PE-glc     | $0.22 \pm 0.010$                                      | $0.098 \pm 0.03$ | $0.042 \pm 0.004$                                   | $0.079 \pm 0.025$                         |
| hexenyl-glc | $0.65 \pm 0.030$                                      | $0.609 \pm 0.11$ | $0.125 \pm 0.012$                                   | $0.493 \pm 0.096$                         |
| linalyl-glc | n.d.                                                  | n.d.             | nd                                                  | nd                                        |
| geranyl-glc | $0.092 \pm 0.015$                                     | $0.101 \pm 0.01$ | $0.018 \pm 0.003$                                   | $0.081 \pm 0.010$                         |
| benzyl-pri  | $1.75 \pm 0.082$                                      | $2.031 \pm 0.20$ | $0.336 \pm 0.032$                                   | $1.64 \pm 0.199$                          |
| 2PE-pri     | $13.0 \pm 0.61$                                       | $8.78 \pm 1.9$   | $2.50 \pm 0.24$                                     | $7.09 \pm 1.63$                           |
| hexenyl-pri | $3.04 \pm 0.14$                                       | $1.505 \pm 0.23$ | $0.584 \pm 0.056$                                   | $1.22 \pm 0.21$                           |
| linalyl-pri | $7.19 \pm 1.20$                                       | $0.079 \pm 0.06$ | $1.38 \pm 0.26$                                     | $0.064 \pm 0.049$                         |
| geranyl-pri | $18.6 \pm 0.67$                                       | $3.789 \pm 0.84$ | $3.57 \pm 0.32$                                     | $3.06 \pm 0.72$                           |

**Supplemental Table S2.** Summary of the purification of CsGT2 from young fresh leaves of *C.sinensis*

|                                                          | Total protein<br>(mg) | Total activity<br>(mU) | Specific activity<br>(mU mg <sup>-1</sup> ) | Yield<br>(%) | Purification fold<br>(-fold) |
|----------------------------------------------------------|-----------------------|------------------------|---------------------------------------------|--------------|------------------------------|
| 1. Crude extract                                         | 681                   | 457                    | 0.67                                        | 100.0        | 1.0                          |
| 2. 30-70%(NH <sub>4</sub> ) <sub>2</sub> SO <sub>4</sub> | 616                   | 414                    | 0.67                                        | 90.5         | 1.0                          |
| 3. HiTrap DEAE                                           | 63                    | 39                     | 0.62                                        | 8.5          | 0.9                          |
| 4. HiTrap Q                                              | 30                    | 29                     | 0.97                                        | 6.3          | 1.4                          |
| 5. Hydroxyapatite                                        | 5.4                   | 8.7                    | 1.61                                        | 1.9          | 2.4                          |
| 6. HiTrap Blue                                           | 0.34                  | 1.1                    | 3.23                                        | 0.24         | 4.8                          |
| 7. Mono Q                                                | 0.15                  | 1.3                    | 8.67                                        | 0.28         | 13                           |

One unit activity was defined as the amount of enzyme biosynthesized 1  $\mu$ mol of geranyl  $\beta$ -primeveroside per minute at 30°C. Specific activity and purification fold were calculated from the activity data.

**Supplemental Table S3.** Gene specific primers used for 5', 3'-RACE, amplification of full-length genes from *C.sinensis*, construction of CsGT2-I141S or real-time PCR.

| gene specific primers        | Primer sequences                        |
|------------------------------|-----------------------------------------|
| At_UGT85A1-Dig-Fw            | 5'-ATGGGATCTCAGATCATTTCATAACT-3'        |
| At_UGT85A1-Dig-Rv            | 5'-TTAATCCTGTGATTTTTGTCCCA-3'           |
| At_UGT85A3-Dig-Fw            | 5'-ATGGGATCCCGTTTTGTTTCTAACGAA-3'       |
| At_UGT85A3-Dig-Rv            | 5'-TTACGTGTTAGGGATCTTTCCCAA-3'          |
| CsGT2-Race-FW                | 5'- GGCTGCTCATATTGCATGGGTATGGCTA-3'     |
| CsGT2-Race-RV                | 5'-CGACAGGGTAGGAGAGAGAGGACTGGTTGT-3'    |
| CACC- <i>Xho</i> I-CsGT1-FW  | 5'-CACCTCGAGATGGGTAGCAGAAAGCAG-3'       |
| CsGT1- <i>Bgl</i> II-stop-RV | 5'-AGATCTTTAGTATTGCTCACAATAGTGAAGAGC-3' |
| CACC- <i>Nde</i> I-CsGT2-FW  | 5'-CACCCATATGGATTCAAAAAGAGCAAAATG-3'    |
| CsGT2- <i>Bam</i> HI-RV      | 5'-GGATCCTAATTTTTGAGCAACTTCACATC-3'     |
| CsGT2-134-I141S-FW           | 5'-GCAGTCCAGCTCATGAGTACCGGAGCCACG-3'    |
| CsGT2-134-I141S-RV           | 5'-CGTGGCTCCGGTACTCATGAGCTGGACTGC-3'    |
| qRT-CsGT1-FW2                | 5'-TGTCCAAAGAGGCATTTTCC-3'              |
| qRT-CsGT1-RV2                | 5'- AAGGATGGCATGTCCTTGAG-3'             |
| qRT-CsGT2-FW2                | 5'-CGCAGTCCAGCTCATGATTA-3'              |
| qRT-CsGT2-RV2                | 5'-TCAACAAAGTGGCGAAACTG-3'              |
| qRT- $\beta$ -PD -FW         | 5'-AAGGATCCCCAGAGGGTCTA-3'              |
| qRT- $\beta$ -PD -RV         | 5'-TCCGAACCTTTGGGTGTAAC -3'             |
| qRT-Cs18SrRNA-FW             | 5'-CACGGGGAGGTAGTGACAAT-3'              |
| qRT-Cs18SrRNA-RV             | 5'-CCTCCAATGGATCCTCGTTA-3'              |

**Supplemental Table S4.** Composition of the buffers and solutions for purification and identification of CsGT2 protein

| Buffer/Solution | Composition                                                                                                                                                                                                                             |
|-----------------|-----------------------------------------------------------------------------------------------------------------------------------------------------------------------------------------------------------------------------------------|
| Buffer A        | 100 mM Tris-HCl (pH 7.5) containing 10 mM sodium ascorbate, 5 mM dithiothreitol, 1 mM phenylmethylsulfonyl, 1 mM EDTA, 0.1% CHAPS, 0.1% (v/v) 2-mercaptoethanol, 5% (w/v) polyvinylpyrrolidone and 10% (w/v) DOWEX1x2(Cl <sup>-</sup> ) |
| Buffer B        | 20 mM Tris-HCl (pH 8.0) containing 0.1% (v/v) 2-mercaptoethanol                                                                                                                                                                         |
| Buffer C        | 20 mM borate buffer (pH 9.0) containing 0.1% (v/v) 2-mercaptoethanol                                                                                                                                                                    |
| Buffer D        | 5 mM potassium phosphate buffer (pH 6.8) containing 0.1% (v/v) 2-mercaptoethanol                                                                                                                                                        |
| Buffer E        | 20 mM potassium phosphate buffer (pH 6.8) containing 0.1% (v/v) 2-mercaptoethanol                                                                                                                                                       |
| Solution F      | 25 mM NH <sub>4</sub> HCO <sub>3</sub> /acetonitrile (1:1 v/v)                                                                                                                                                                          |
| Solution G      | 10 mM dithiothreitol/50 mM NH <sub>4</sub> HCO <sub>3</sub>                                                                                                                                                                             |
| Solution H      | 55 mM iodoacetoamide/50 mM NH <sub>4</sub> HCO <sub>3</sub>                                                                                                                                                                             |
| Solution I      | 50% acetonitrile containing 1% formic acid                                                                                                                                                                                              |

**Supplemental Table S5.** GenBank accession numbers used for construction of the phylogenetic tree in Figure 7.

| Abbreviation         | Plant species                |                       | Accession NO |
|----------------------|------------------------------|-----------------------|--------------|
| Ad_GT4               | <i>Actinidia deliciosa</i>   | fuzzy kiwifruit       | AIL51400     |
| At_UGT79B1           | <i>Arabidopsis thaliana</i>  | Arabidopsis           | NP_200217    |
| At_UGT79B6           | <i>Arabidopsis thaliana</i>  | Arabidopsis           | NP_200212    |
| At_UGT85A3           | <i>Arabidopsis thaliana</i>  | Arabidopsis           | NP_173655    |
| Bp_UGT94B1           | <i>Bellis perennis</i>       | daisy                 | Q5NTH0       |
| Cm_F7G2RhaT          | <i>Citrus maxima</i>         | pomelo                | Q8GVE3       |
| Cr_UGT3              | <i>Catharanthus roseus</i>   | madagascar periwinkle | BAH80312     |
| Cr_UGT4              | <i>Catharanthus roseus</i>   | madagascar periwinkle | BAH80313     |
| Cr_UGT85A23          | <i>Catharanthus roseus</i>   | madagascar periwinkle | F8WLS6       |
| Cs_F7G6RhaT          | <i>Citrus sinensis</i>       | orange                | NP_001275829 |
| Cs_UGT1_UGT85K11     | <i>Camellia sinensis</i>     | tea plant             | BAO51834     |
| Cs_UGT2_UGT94P1      | <i>Camellia sinensis</i>     | tea plant             | BAO51835     |
| Gj_UGT85A24          | <i>Gardenia jasminoides</i>  | gardenia              | F8WKW1       |
| Gm_SGT3_UGT91H4_RhaT | <i>Glycine max</i>           | soybean               | NP_001240857 |
| Ib_UGT85A32          | <i>Ipomoea batatas</i>       | sweet potato          | BAO51842     |
| Ip_UGT79G16          | <i>Ipomoea purpurea</i>      | morning glory         | Q53UH5       |
| Me_UGT85K4           | <i>Manihot esculenta</i>     | cassava               | AEO45781     |
| Me_UGT85K5           | <i>Manihot esculenta</i>     | cassava               | AEO45782     |
| Mt_UGT85H2           | <i>Medicago truncatula</i>   | barrel clover         | XP_003618665 |
| Nh_Rt                | <i>Nierembergia sp. NB17</i> | cupflower             | BAC10994     |
| Pd_UGT85A19          | <i>Prunus dulcis</i>         | almond                | ABV68925     |
| Ph_Rt (UGT79A1)      | <i>Petunia x hybrida</i>     | petunia               | CAA50376     |
| Sb_UGT85B1           | <i>Sorghum bicolor</i>       | sorghum               | XP_002463518 |
| Si_UGT94D1           | <i>Sesamum indicum</i>       | sesame                | BAF99027     |
| SI_NSQT1             | <i>Solanum lycopersicum</i>  | tomato                | AGO03777     |
| Sr_UGT85A8           | <i>Stevia rebaudiana</i>     | stevia                | AAR06913     |
| Sr_UGT85C1           | <i>Stevia rebaudiana</i>     | stevia                | AAR06922     |
| Sr_UGT85C2           | <i>Stevia rebaudiana</i>     | stevia                | AAR06916     |
| Vp_UGT94F1           | <i>Veronica persica</i>      | persian speedwell     | BAI44133     |
| VvGT16               | <i>Vitis vinifera</i>        | grapevine             | XP_002263158 |
| Vv_UGT85A28 (VvGT14) | <i>Vitis vinifera</i>        | grapevine             | BAO51844     |
| Vv_UGT85A30          | <i>Vitis vinifera</i>        | grapevine             | NP_001277170 |
| Vv_UGT85A33          | <i>Vitis vinifera</i>        | grapevine             | NP_001277168 |
